# Supplementary material for: Communicating with conscious and mechanically ventilated critically ill patients: a systematic review
Source: PubMed Central journal article supplement (PMC5070186; doi:10.1186/s13054-016-1483-2), 2016-10-19
Supplement: 13054_2016_1483_MOESM2_ESM.pdf [file 13054_2016_1483_MOESM2_ESM.pdf]

**Additional file 2. Critical Appraisal (QATSDD) (range 0-42)**

| Criteria                                                                                                                           | Communication boards |             |               |             | Speaking valve |             |             |             |              |               |               |             | Electrolarynx |              |               |               |               |           | "High-tech" AAC |            |               |             |                    |                  | Divers          |                 | % of maximum possible score obtained by all papers |                        |                 |            |
|------------------------------------------------------------------------------------------------------------------------------------|----------------------|-------------|---------------|-------------|----------------|-------------|-------------|-------------|--------------|---------------|---------------|-------------|---------------|--------------|---------------|---------------|---------------|-----------|-----------------|------------|---------------|-------------|--------------------|------------------|-----------------|-----------------|----------------------------------------------------|------------------------|-----------------|------------|
|                                                                                                                                    | Otuzoglu, 2013       | Patak, 2006 | Stovsky, 1988 | Kluin, 1984 | Kunduk, 2010   | Leder, 1990 | Leder, 1989 | Leder, 2013 | Mitate, 2015 | Pandian, 2014 | Sparker, 1987 | Adler, 1986 | Ewing, 1975   | Girbes, 2014 | Shimizu, 2013 | Summers, 1973 | Tuinman, 2014 | Wu, 1974  | Happ, 2004      | Happ, 2005 | Etchels, 2003 | Garry, 2015 | Koszalkinski, 2014 | Maringelli, 2013 | Miglietta, 2004 | Rodriguez, 2012 |                                                    | Van den Boogaard, 2003 | Dowden, 1986a,b | Happ, 2014 |
| 1. Explicit theoretical framework                                                                                                  | 3                    | 3           | 2             | 2           | 2              | 2           | 2           | 3           | 2            | 2             | 1             | 1           | 1             | 1            | 1             | 2             | 2             | 2         | 3               | 3          | 2             | 3           | 3                  | 2                | 2               | 2               | 2                                                  | 1                      | 2               | 68         |
| 2. Statement of aims/objectives in main body of report                                                                             | 2                    | 3           | 3             | 2           | 2              | 2           | 2           | 2           | 3            | 3             | 1             | 1           | 2             | 2            | 2             | 2             | 2             | 2         | 3               | 3          | 1             | 3           | 1                  | 3                | 2               | 3               | 1                                                  | 3                      | 3               | 74         |
| 3. Clear description of research setting                                                                                           | 3                    | 2           | 3             | 1           | 3              | 1           | 1           | 2           | 1            | 1             | 2             | 2           | 1             | 1            | 3             | 1             | 2             | 3         | 3               | 3          | 2             | 3           | 1                  | 3                | 3               | 3               | 1                                                  | 2                      | 3               | 69         |
| 4. Evidence of sample size considered in terms of analysis                                                                         | 2                    | 0           | 0             | 0           | 0              | 0           | 0           | 0           | 0            | 0             | 0             | 0           | 0             | 0            | 0             | 0             | 0             | 0         | 0               | 0          | 0             | 0           | 0                  | 0                | 0               | 0               | 0                                                  | 0                      | 3               | 6          |
| 5. Representative sample of target group of reasonable size                                                                        | 1                    | 1           | 1             | 1           | 1              | 1           | 1           | 1           | 1            | 1             | 1             | 1           | 1             | 1            | 1             | 1             | 1             | 1         | 1               | 1          | 1             | 1           | 1                  | 1                | 1               | 1               | 1                                                  | 1                      | 2               | 34         |
| 6. Description of procedure for data collection                                                                                    | 2                    | 2           | 3             | 1           | 2              | 3           | 3           | 3           | 1            | 1             | 2             | 2           | 1             | 1            | 2             | 2             | 1             | 2         | 2               | 2          | 2             | 2           | 1                  | 2                | 2               | 3               | 3                                                  | 2                      | 3               | 67         |
| 7. Rationale for choice of data collection tool(s)                                                                                 | 0                    | 0           | 1             | 0           | 0              | 1           | 1           | 1           | 0            | 0             | 2             | 0           | 1             | 0            | 0             | 0             | 1             | 0         | 2               | 2          | 1             | 2           | 0                  | 2                | 1               | 2               | 0                                                  | 1                      | 2               | 26         |
| 8. Detailed recruitment data                                                                                                       | 1                    | 3           | 3             | 1           | 2              | 2           | 2           | 2           | 2            | 1             | 1             | 2           | 1             | 2            | 2             | 2             | 1             | 1         | 2               | 2          | 2             | 1           | 1                  | 1                | 2               | 2               | 2                                                  | 1                      | 3               | 57         |
| 9. Statistical assessment of reliability and validity of measurement tool(s) (Quantitative only)                                   | 0                    | #           | 2             | 0           | 0              | 0           | 0           | 0           | #            | #             | 0             | 0           | 0             | 0            | 0             | 0             | 0             | 2         | 2               | 0          | 1             | #           | 0                  | #                | 1               | 0               | 0                                                  | 3                      | 15              |            |
| 10. Fit between stated research question and method of data collection (Quantitative only)                                         | 2                    | #           | 2             | 1           | 1              | 2           | 2           | 2           | #            | #             | 2             | 2           | 1             | 0            | 0             | 1             | 2             | 1         | 2               | 2          | 2             | 2           | #                  | 2                | #               | 2               | 1                                                  | 2                      | 2               | 53         |
| 11. Fit between stated research question and format and content of data collection tool e.g. interview schedule (Qualitative only) | X                    | 2           | X             | X           | X              | X           | X           | X           | 1            | 1             | X             | X           | X             | X            | X             | X             | X             | X         | 2               | 2          | X             | X           | 1                  | X                | 2               | X               | X                                                  | X                      | 0               | 46         |
| 12. Fit between research question and method of analysis                                                                           | 2                    | 1           | 2             | 1           | 2              | 2           | 2           | 2           | 1            | 1             | 1             | 1           | 1             | 0            | 0             | 1             | 2             | 1         | 3               | 3          | 1             | 2           | 1                  | 2                | 1               | 3               | 1                                                  | 2                      | 3               | 52         |
| 13. Good justification for analytical method selected                                                                              | 0                    | 1           | 0             | 0           | 0              | 0           | 0           | 0           | 0            | 0             | 0             | 0           | 0             | 0            | 0             | 0             | 0             | 1         | 1               | 0          | 2             | 0           | 0                  | 0                | 1               | 0               | 1                                                  | 3                      | 11              |            |
| 14. Assessment of reliability of analytical process (Qualitative only)                                                             | X                    | 2           | X             | X           | X              | X           | X           | X           | 0            | 0             | X             | X           | X             | X            | X             | X             | X             | X         | 2               | 2          | X             | X           | 0                  | X                | 0               | X               | X                                                  | X                      | 0               | 25         |
| 15. Evidence of user involvement in design                                                                                         | 0                    | 0           | 0             | 0           | 0              | 0           | 0           | 0           | 0            | 0             | 0             | 0           | 0             | 0            | 0             | 0             | 0             | 0         | 0               | 0          | 0             | 0           | 0                  | 0                | 0               | 0               | 0                                                  | 0                      | 0               | 0          |
| 16. Strengths and limitations critically discussed                                                                                 | 2                    | 1           | 3             | 2           | 2              | 2           | 2           | 2           | 2            | 2             | 2             | 2           | 2             | 1            | 2             | 2             | 1             | 2         | 2               | 2          | 1             | 3           | 1                  | 2                | 2               | 2               | 2                                                  | 1                      | 3               | 63         |
| <b>Total score</b>                                                                                                                 | <b>20</b>            | <b>21</b>   | <b>25</b>     | <b>12</b>   | <b>17</b>      | <b>18</b>   | <b>18</b>   | <b>20</b>   | <b>14</b>    | <b>13</b>     | <b>15</b>     | <b>14</b>   | <b>12</b>     | <b>9</b>     | <b>13</b>     | <b>14</b>     | <b>15</b>     | <b>15</b> | <b>30</b>       | <b>30</b>  | <b>15</b>     | <b>25</b>   | <b>11</b>          | <b>20</b>        | <b>18</b>       | <b>25</b>       | <b>14</b>                                          | <b>17</b>              | <b>35</b>       |            |
| <b>% of highest possible score</b>                                                                                                 | <b>48</b>            | <b>50</b>   | <b>60</b>     | <b>29</b>   | <b>40</b>      | <b>43</b>   | <b>43</b>   | <b>48</b>   | <b>33</b>    | <b>31</b>     | <b>36</b>     | <b>33</b>   | <b>29</b>     | <b>21</b>    | <b>31</b>     | <b>33</b>     | <b>36</b>     | <b>36</b> | <b>63</b>       | <b>63</b>  | <b>36</b>     | <b>60</b>   | <b>26</b>          | <b>48</b>        | <b>43</b>       | <b>60</b>       | <b>33</b>                                          | <b>40</b>              | <b>73</b>       |            |

Criteria were scored on a scale from 0 to 3 (0 = not at all, 1 = very slightly, 2 = moderately, 3 = complete, # = no quantitative methods used, X = no qualitative methods used); AAC = Augmentative and Alternative Communication
